# Supplementary material
Source: PubMed Central journal article supplement (PMC6537114)
Supplement: Supp_Table1.pdf [file Supp_Table1.pdf]

## Supplementary Data

SUPPLEMENTARY TABLE S1. MULTIVARIABLE-ADJUSTED HAZARD RATIOS (95% CONFIDENCE INTERVALS)  
FOR PRETERM DELIVERY IN FIRST BIRTH AND CARDIOVASCULAR DISEASE RISK FACTORS

|                                 | <i>Term:</i><br>≥37 weeks<br>(n=53,341) | <i>Preterm:</i><br><37 weeks<br>(n=4,563) | <i>Moderate preterm:</i><br>≥32 to <37 weeks<br>(n=3,400) | <i>Very preterm:</i><br><32 weeks<br>(n=1,163) | <i>p-Trend<sup>a</sup></i> |
|---------------------------------|-----------------------------------------|-------------------------------------------|-----------------------------------------------------------|------------------------------------------------|----------------------------|
| <b>Chronic hypertension</b>     |                                         |                                           |                                                           |                                                |                            |
| Cases/person-years              | 16,557/1,453,407                        | 1,507/120,769                             | 1,079/90,279                                              | 428/30,490                                     |                            |
| Model 1                         | 1.00 (ref)                              | 1.12 (1.06–1.18)                          | 1.06 (1.00–1.13)                                          | 1.29 (1.17–1.41)                               | <0.0001                    |
| Model 2                         | 1.00 (ref)                              | 1.11 (1.06–1.17)                          | 1.06 (1.00–1.13)                                          | 1.28 (1.16–1.41)                               | <0.0001                    |
| Model 3                         | 1.00 (ref)                              | 1.11 (1.06–1.17)                          | 1.06 (1.00–1.13)                                          | 1.28 (1.16–1.41)                               | <0.0001                    |
| <b>Type 2 diabetes mellitus</b> |                                         |                                           |                                                           |                                                |                            |
| Cases/person-years              | 2,557/1,689,982                         | 264/142,579                               | 173/105,729                                               | 91/36,850                                      |                            |
| Model 1                         | 1.00 (ref)                              | 1.24 (1.09–1.40)                          | 1.10 (0.94–1.28)                                          | 1.62 (1.32–2.00)                               | <0.0001                    |
| Model 2                         | 1.00 (ref)                              | 1.18 (1.04–1.35)                          | 1.07 (0.92–1.25)                                          | 1.50 (1.22–1.85)                               | 0.0003                     |
| Model 3                         | 1.00 (ref)                              | 1.17 (1.03–1.33)                          | 1.06 (0.91–1.24)                                          | 1.48 (1.19–1.83)                               | 0.0007                     |
| <b>Hypercholesterolemia</b>     |                                         |                                           |                                                           |                                                |                            |
| Cases/person-years              | 28,656/1,342,159                        | 2,527/112,099                             | 1,866/83,267                                              | 661/28,832                                     |                            |
| Model 1                         | 1.00 (ref)                              | 1.07 (1.03–1.11)                          | 1.06 (1.01–1.11)                                          | 1.09 (1.01–1.18)                               | 0.001                      |
| Model 2                         | 1.00 (ref)                              | 1.07 (1.02–1.11)                          | 1.06 (1.01–1.11)                                          | 1.09 (1.01–1.18)                               | 0.002                      |
| Model 3                         | 1.00 (ref)                              | 1.07 (1.03–1.11)                          | 1.06 (1.01–1.11)                                          | 1.09 (1.01–1.18)                               | 0.002                      |

Model 1 is adjusted for age at first birth and age in 1989.

Model 2 is additionally adjusted for race/ethnicity, parental education, family history of hypertension (for the chronic hypertension model), and family history of type 2 diabetes mellitus (for the type 2 diabetes mellitus model).

Model 3 is additionally adjusted for prepregnancy BMI, prepregnancy smoking, prepregnancy Alternative Healthy Eating Index (AHEI) score (in quintiles), prepregnancy alcohol intake, prepregnancy (age 18) physical activity, and prepregnancy oral contraceptive use.

<sup>a</sup>Exposure included in model as a continuous variable with 40 weeks representing term delivery, 36 weeks representing moderate preterm delivery, and 30 weeks representing very preterm delivery.

BMI, body mass index.
