# Supplementary material
Source: PubMed Central journal article supplement (PMC6537114)
Supplement: Supp_Table2.pdf [file Supp_Table2.pdf]

SUPPLEMENTARY TABLE S2. MULTIVARIABLE-ADJUSTED HAZARD RATIOS (95% CONFIDENCE INTERVALS) FOR PRETERM DELIVERY IN FIRST BIRTH CLASSIFIED BY LIVE AND STILLBIRTH AND CARDIOVASCULAR DISEASE RISK FACTORS

|                                 | Cases/person-years | Term:<br>≥37 weeks<br>(n = 53,200) | Moderate<br>preterm ≥32<br>to <37 weeks<br>(n = 3,385) | Very preterm<br>live birth<br><32 weeks<br>(n = 546) | Very preterm<br>stillbirth<br><32 weeks<br>(n = 611) | p-Trend <sup>a</sup> |
|---------------------------------|--------------------|------------------------------------|--------------------------------------------------------|------------------------------------------------------|------------------------------------------------------|----------------------|
| <b>Chronic hypertension</b>     |                    |                                    |                                                        |                                                      |                                                      |                      |
| Overall <sup>b</sup>            | 18,004/1,569,964   | 1.00 (ref)                         | 1.06 (1.00–1.13)                                       | 1.33 (1.16–1.53)                                     | 1.25 (1.09–1.42)                                     | <0.0001              |
| 1–10 years                      | 1,269/571,948      | 1.00 (ref)                         | 1.22 (0.98–1.51)                                       | 2.21 (1.50–3.27)                                     | 1.97 (1.32–2.94)                                     | <0.0001              |
| 11–20 years                     | 5,455/519,593      | 1.00 (ref)                         | 0.96 (0.86–1.08)                                       | 1.58 (1.25–1.99)                                     | 1.37 (1.09–1.73)                                     | 0.001                |
| 21–30 years                     | 7,779/350,306      | 1.00 (ref)                         | 1.05 (0.95–1.15)                                       | 1.05 (0.82–1.33)                                     | 1.28 (1.04–1.57)                                     | 0.01                 |
| 31–40 years                     | 3,233/117,627      | 1.00 (ref)                         | 1.16 (1.01–1.34)                                       | 1.16 (0.82–1.62)                                     | 0.73 (0.49–1.07)                                     | 0.89                 |
| <b>Type 2 diabetes mellitus</b> |                    |                                    |                                                        |                                                      |                                                      |                      |
| Overall <sup>b</sup>            | 2,814/1,827,461    | 1.00 (ref)                         | 1.06 (0.91–1.24)                                       | 1.38 (0.99–1.91)                                     | 1.58 (1.20–2.09)                                     | 0.0002               |
| 1–10 years <sup>c</sup>         | 41/559,277         | 1.00 (ref)                         | 3.37 (1.45–7.83)                                       | 3.88 (0.84–17.87)                                    | —                                                    | 0.17                 |
| 11–20 years                     | 526/565,930        | 1.00 (ref)                         | 1.20 (0.86–1.68)                                       | 2.21 (1.21–4.04)                                     | 1.37 (0.64–2.90)                                     | 0.03                 |
| 21–30 years                     | 1,295/461,258      | 1.00 (ref)                         | 0.99 (0.78–1.26)                                       | 1.18 (0.69–1.99)                                     | 1.61 (1.08–2.42)                                     | 0.04                 |
| 31–40 years                     | 885/200,962        | 1.00 (ref)                         | 0.99 (0.74–1.32)                                       | 1.03 (0.55–1.92)                                     | 1.85 (1.18–2.90)                                     | 0.03                 |
| <b>Hypercholesterolemia</b>     |                    |                                    |                                                        |                                                      |                                                      |                      |
| Overall <sup>b</sup>            | 31,090/1,450,172   | 1.00 (ref)                         | 1.06 (1.01–1.11)                                       | 1.06 (0.94–1.18)                                     | 1.11 (1.00–1.24)                                     | 0.004                |
| 1–10 years                      | 4,545/561,485      | 1.00 (ref)                         | 1.10 (0.98–1.23)                                       | 1.31 (1.01–1.72)                                     | 1.17 (0.88–1.56)                                     | 0.02                 |
| 11–20 years                     | 10,340/482,278     | 1.00 (ref)                         | 1.06 (0.98–1.15)                                       | 1.00 (0.82–1.22)                                     | 1.21 (1.01–1.45)                                     | 0.03                 |
| 21–30 years                     | 11,338/304,799     | 1.00 (ref)                         | 1.02 (0.94–1.10)                                       | 1.02 (0.84–1.25)                                     | 1.01 (0.84–1.21)                                     | 0.73                 |
| 31–40 years                     | 4,614/93,958       | 1.00 (ref)                         | 1.07 (0.95–1.21)                                       | 0.95 (0.70–1.29)                                     | 1.07 (0.83–1.38)                                     | 0.50                 |

Models are adjusted for age at first birth, age in 1989, race/ethnicity, parental education, family history of hypertension (for the chronic hypertension model), family history of type 2 diabetes mellitus (for the type 2 diabetes mellitus model), prepregnancy BMI, prepregnancy smoking, prepregnancy Alternative Healthy Eating Index (AHEI) score (in quintiles), prepregnancy alcohol intake, prepregnancy (age 18) physical activity, and prepregnancy oral contraceptive use.

<sup>a</sup>Exposure included in model as a continuous variable with 40 weeks representing term delivery, 36 weeks representing moderate preterm delivery, and 30 weeks representing very preterm delivery.

<sup>b</sup>Includes all 49 years of follow-up for chronic hypertension and hypercholesterolemia and 50 years for type 2 diabetes mellitus.

<sup>c</sup>Asian race and other race were combined as there were 0 diabetes cases in Asian women; women who were underweight ( $n = 1,256$ ) or missing BMI ( $n = 498$ ) were excluded because there were 0 cases in these BMI groups; there were 0 cases in the very preterm stillbirth group, thus the hazard ratio was inestimable.
